# Supplementary material
Source: PubMed Central journal article supplement (PMC3997580)
Supplement: supp_jit678_jit678supp.pdf [file supp_jit678_jit678supp.pdf]

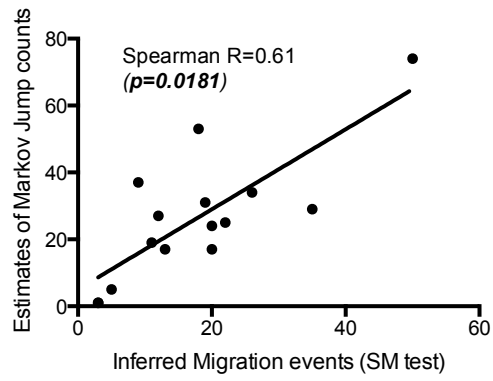

**Figure S1. Correlation between estimates of Markov Jump counts and inferred migration events using a Slatkin-Maddison (SM) test.** Spearman correlation test are indicated at the top of the figure with p-value in brackets.
